# Supplementary material for: Clinical, Neuroimaging and Robotic Measures Predict Long-Term Proprioceptive Impairments following Stroke
Source: MDPI journal article supplement (doi:10.3390/brainsci13060953), 2023-06-15
Supplement: s1 [file s1]

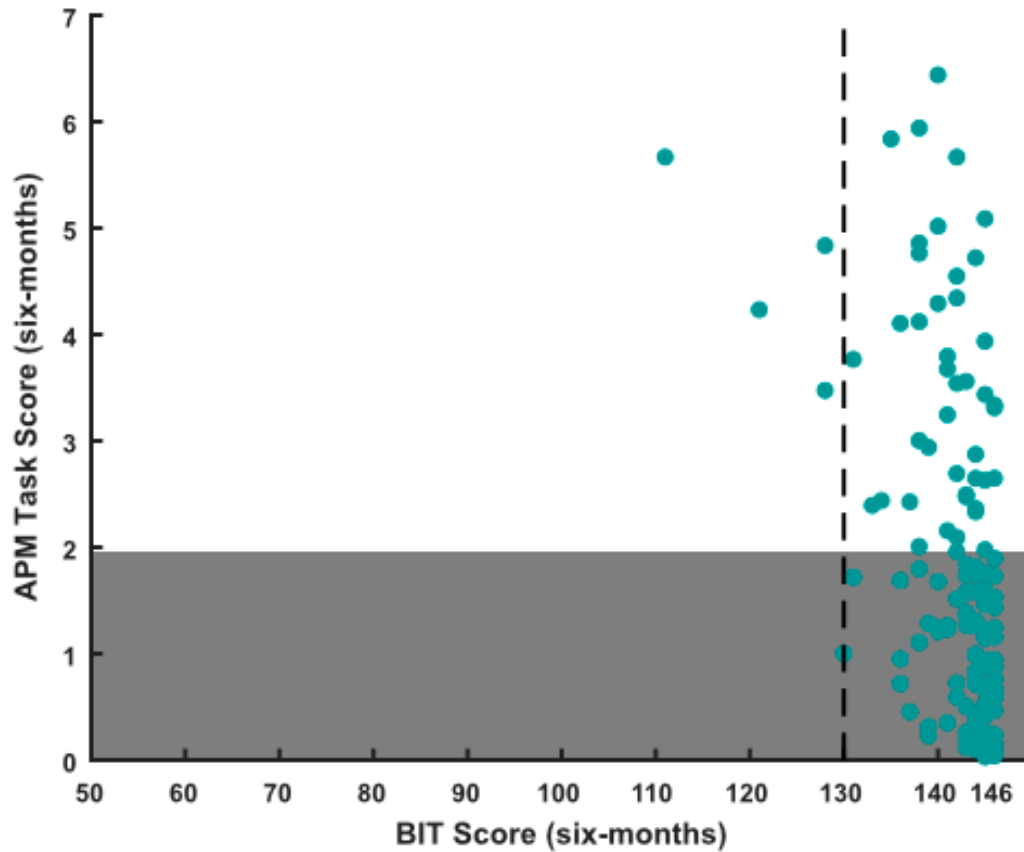

**Supplemental Figure S1. Relationship between six-month BIT scores and APM Task Scores -** Behavioural Inattention Test (BIT) scores, collected at six-months post-stroke and APM Task Scores. Grey area denotes the normal range of performance for healthy controls on the APM task. Data points outside of this range indicate participants with impairments on the APM task. Dashed line at a BIT score of 130, indicates the cut-off BIT score. Points to the left of this line (below 130) indicate the presence of hemispatial neglect six-months post-stroke. BIT = Behavioural Inattention Test.

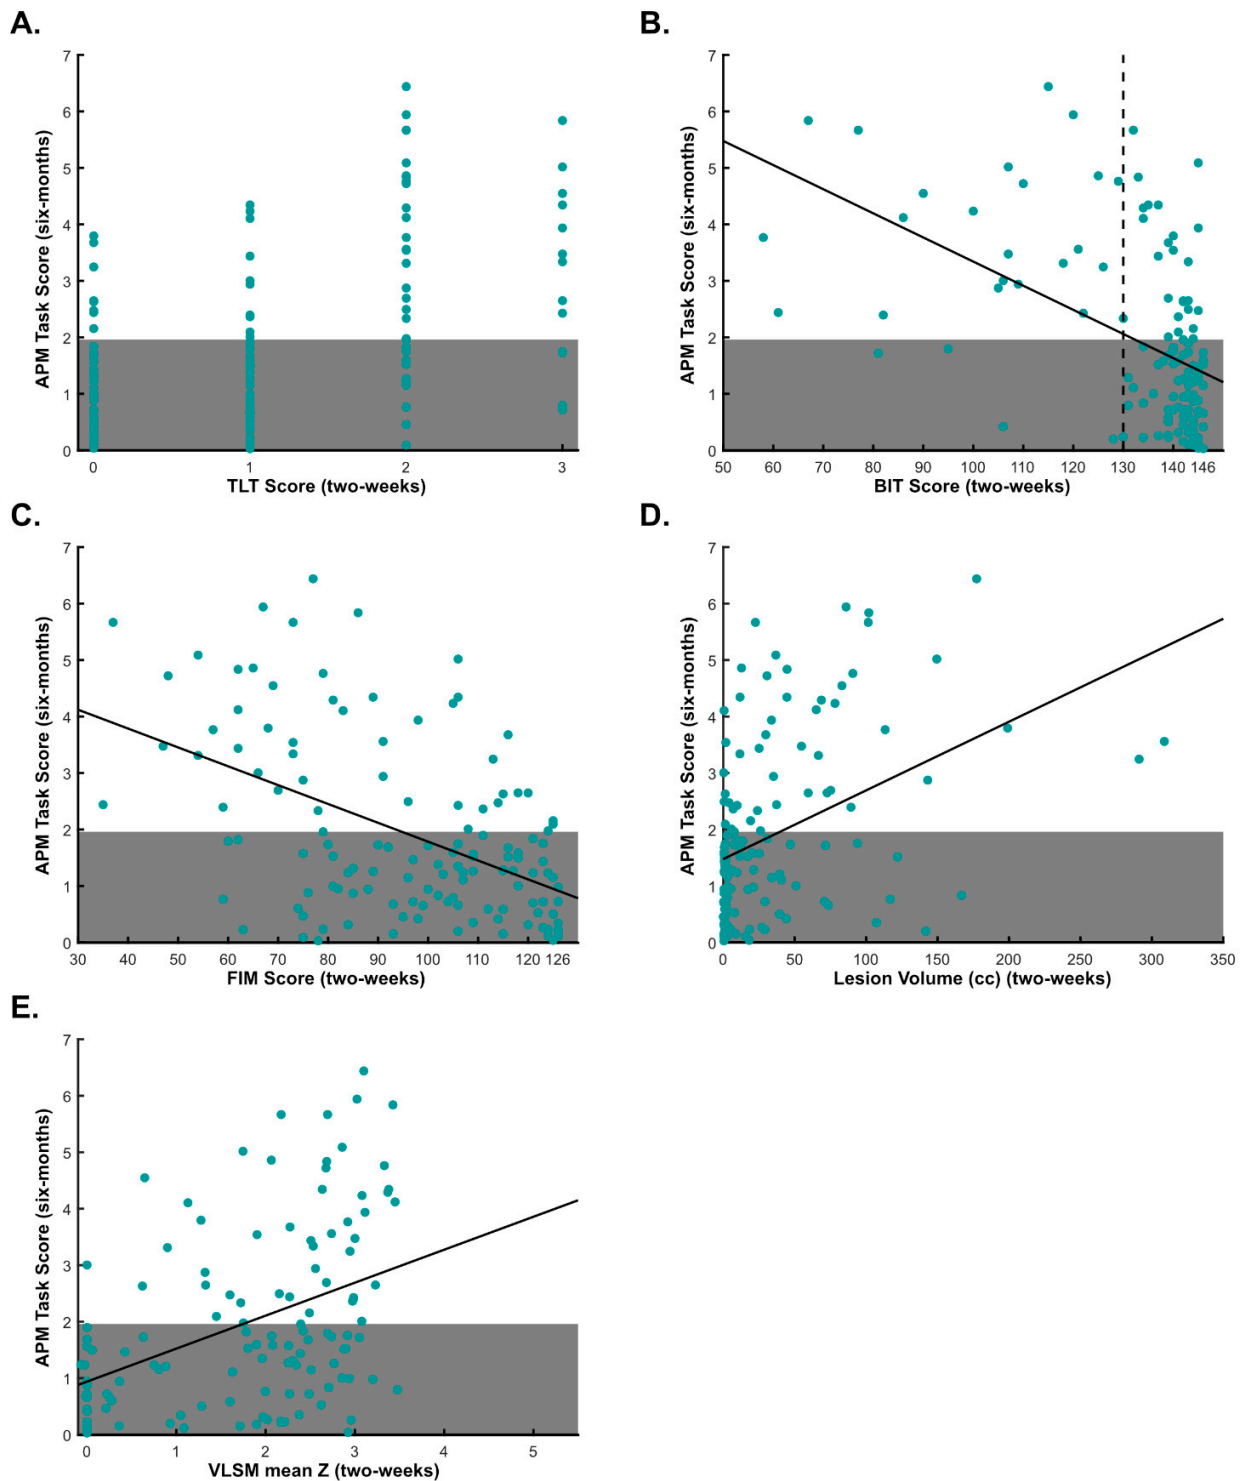

**Supplemental Figure S2. Examining the relationships between two-week clinical and neuroimaging measures and six-month Arm Position Matching Task Scores** – Plots display the relationship between clinical and neuroimaging measures collected at two-weeks post-stroke and Arm Position Matching Task Scores at six-months post-stroke. A) Thumb Localisation Test scores, B) Behavioural Inattention Test

scores, C) Functional Independence Measure scores, D) Lesion Volume and E) VLSM Mean Z scores. Individual data points are presented for each measure. Grey area denotes the normal range of performance for healthy controls on the APM task. Data points outside of this range indicate participants with impairments on the APM task. Dashed line in panel B, at a score of 130, indicates the cut-off BIT score. Points to the left of this line (below 130) indicate the presence of hemispatial neglect. TLT = Thumb Localisation Test, BIT = Behavioural Inattention Test, FIM = Functional Independence Measure, VLSM = Voxel-based Lesion Symptom Mapping.

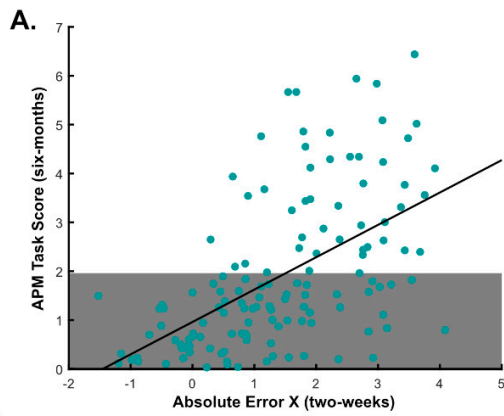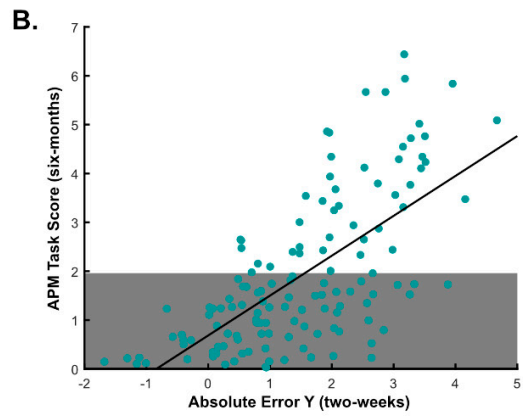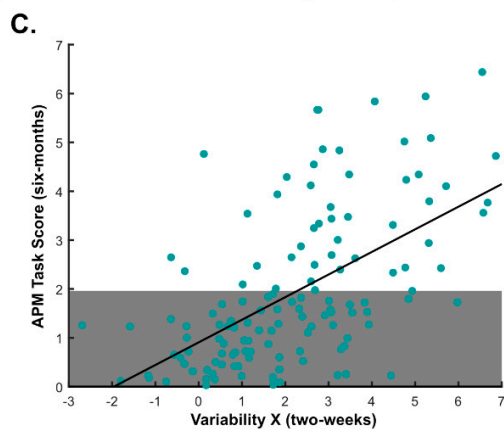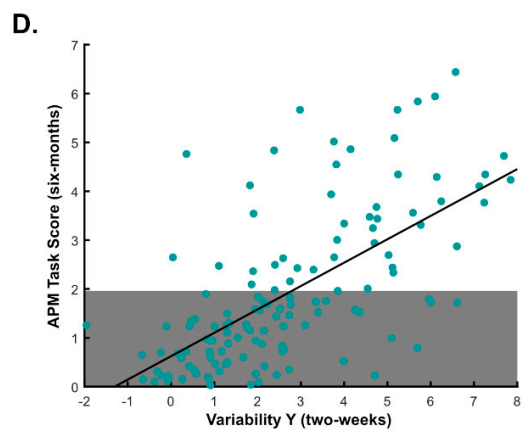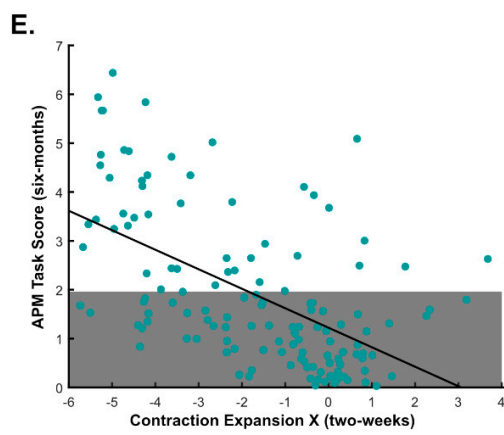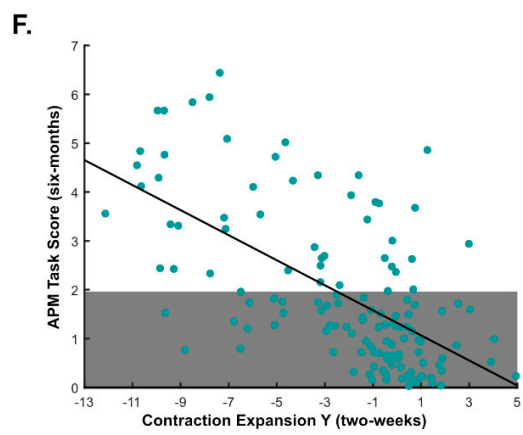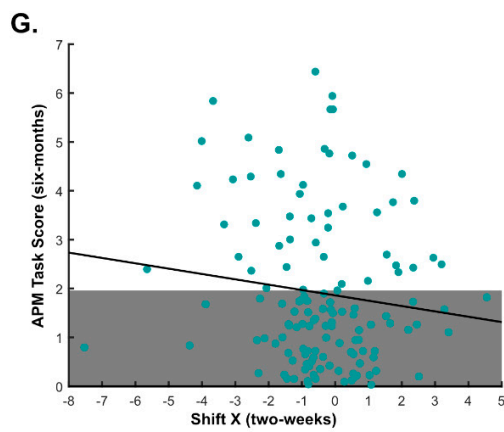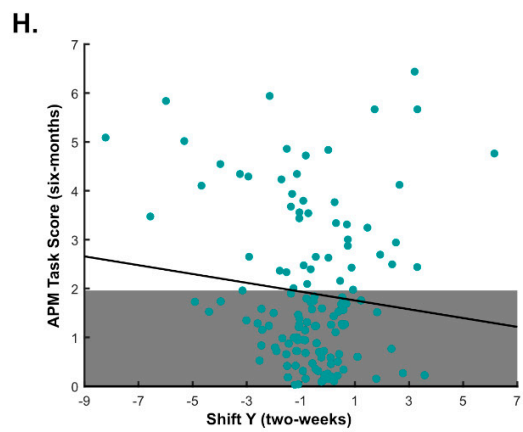

**Supplemental Figure S3. Examining the relationships between two-week robotic measures and six-month Arm Position Matching Task Scores** - Plots display the relationship between robotic measures collected at two-weeks post-stroke and Arm Position Matching Task Scores at six-months post-stroke. A) Absolute Error X, B) Absolute Error Y, C) Variability X, D) Variability Y, E) Contraction Expansion X, F) Contraction Expansion Y, G) Shift X, and H) Shift Y. All scores are parameter z scores. Individual data points are presented for each measure. Grey area denotes the normal range of performance for healthy controls on the APM task. Data points outside of this range indicate participants with impairments on the APM task.

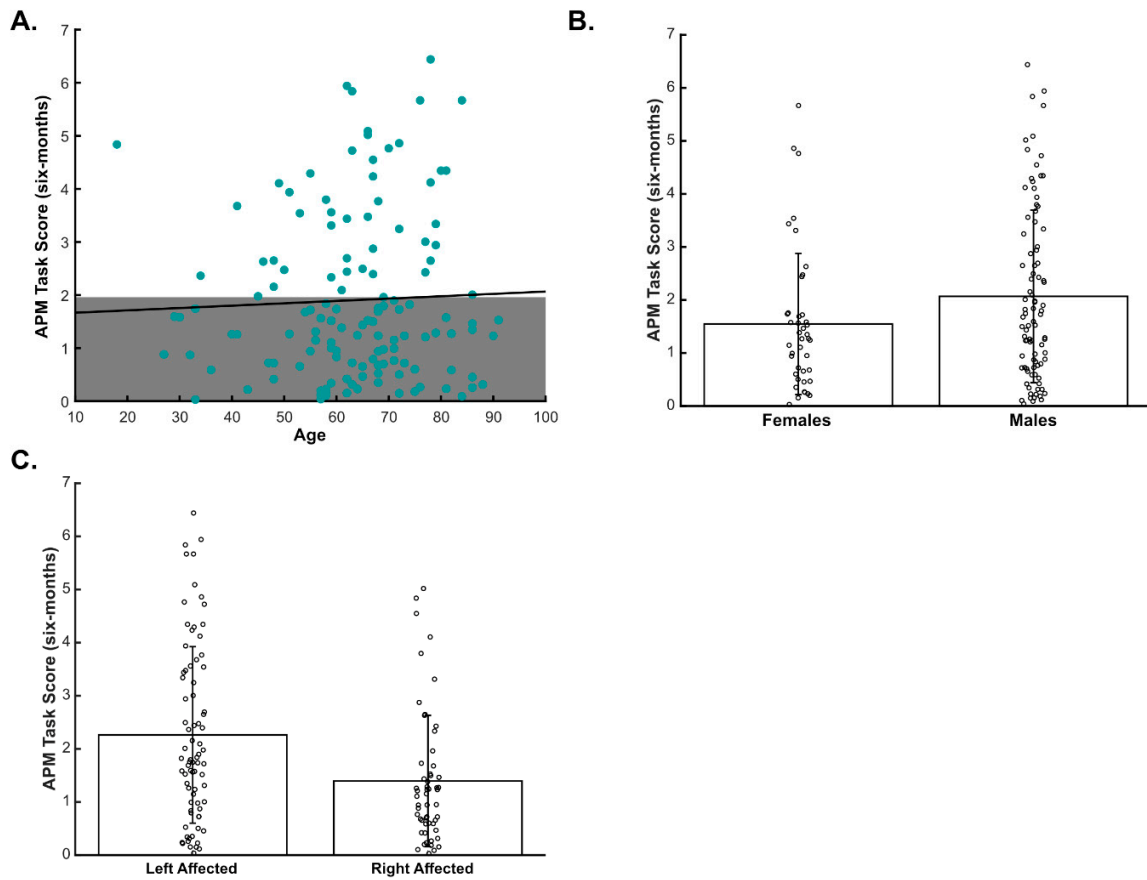

**Supplemental Figure S4. Examining the relationships between demographic measures and six-month Arm Position Matching Task Scores** – A) Plot displays the relationship between Age and six-month APM Task Scores. Grey area denotes the normal range of performance for healthy controls on the APM task. Data points outside of this range indicate participants with impairments on the APM task. B) and C) display six-month APM Task for females and males (B), and left and right affected individuals (C). Group means are presented, with standard deviations and individual data points also shown.

|                         | Coefficient             | Std. Error            | p-value | CI [95%]                                     |
|-------------------------|-------------------------|-----------------------|---------|----------------------------------------------|
| <b>Basic Model</b>      |                         |                       |         |                                              |
| Age                     | -0.0027                 | 0.004                 | 0.549   | -0.011 0.006                                 |
| Sex                     | -0.0708                 | 0.389                 | 0.856   | -0.834 0.693                                 |
| Affected Arm            | -0.6633                 | 0.357                 | 0.063   | -1.363 0.036                                 |
| <b>Clinical Model</b>   |                         |                       |         |                                              |
| Age                     | 0.0185                  | 0.012                 | 0.129   | -0.005 0.042                                 |
| Sex                     | 0.2055                  | 0.452                 | 0.650   | -0.681 1.092                                 |
| Affected Arm            | -0.6551                 | 0.427                 | 0.125   | -1.493 0.182                                 |
| TLT                     | 0.9513                  | 0.224                 | 0.000   | 0.513 1.390                                  |
| BIT                     | -0.0130                 | 0.010                 | 0.191   | -0.032 0.006                                 |
| FIM                     | -0.0100                 | 0.011                 | 0.365   | -0.032 0.012                                 |
| <b>Imaging Model</b>    |                         |                       |         |                                              |
| Age                     | -0.0269                 | 0.007                 | 0.000   | -0.042 -0.012                                |
| Sex                     | -0.2184                 | 0.457                 | 0.632   | -1.113 0.676                                 |
| Affected Arm            | -0.7606                 | 0.406                 | 0.061   | -1.556 0.035                                 |
| VLSM Mean Z             | 0.6665                  | 0.198                 | 0.001   | 0.278 1.054                                  |
| Lesion Volume           | 1.242 x10 <sup>-5</sup> | 4.79x10 <sup>-6</sup> | 0.009   | 3.04x10 <sup>-6</sup> 2.18x10 <sup>-5</sup>  |
| <b>Robotic Model</b>    |                         |                       |         |                                              |
| Age                     | -0.0485                 | 0.011                 | 0.000   | -0.071 -0.026                                |
| Sex                     | -0.2090                 | 0.542                 | 0.700   | -1.271 0.853                                 |
| Affected Arm            | -0.9762                 | 0.533                 | 0.067   | -2.022 0.069                                 |
| Absolute Error X        | 0.4643                  | 0.362                 | 0.200   | -0.245 1.174                                 |
| Absolute Error Y        | -0.0292                 | 0.409                 | 0.943   | -0.830 0.772                                 |
| Variability X           | -0.2706                 | 0.322                 | 0.400   | -0.901 0.360                                 |
| Variability Y           | 0.8015                  | 0.313                 | 0.010   | 0.188 1.415                                  |
| Contraction Expansion X | -0.0098                 | 0.156                 | 0.950   | -0.316 0.296                                 |
| Contraction Expansion Y | -0.2829                 | 0.106                 | 0.008   | -0.491 -0.074                                |
| Shift X                 | 0.0373                  | 0.137                 | 0.785   | -0.231 0.305                                 |
| ShiftY                  | 0.1654                  | 0.131                 | 0.207   | -0.091 0.422                                 |
| <b>Augmented Model</b>  |                         |                       |         |                                              |
| Age                     | -0.0253                 | 0.019                 | 0.189   | -0.063 0.012                                 |
| Sex                     | -0.0606                 | 0.588                 | 0.918   | -1.213 1.091                                 |
| Affected Arm            | -0.8566                 | 0.570                 | 0.133   | -1.974 0.261                                 |
| TLT                     | 0.2328                  | 0.341                 | 0.495   | -0.436 0.902                                 |
| BIT                     | -0.0166                 | 0.013                 | 0.206   | -0.042 0.009                                 |
| FIM                     | 0.0037                  | 0.015                 | 0.809   | -0.026 0.033                                 |
| VLSM Mean Z             | 0.3332                  | 0.319                 | 0.296   | -0.292 0.958                                 |
| Lesion Volume           | 2.291x10 <sup>-6</sup>  | 6.00x10 <sup>-6</sup> | 0.703   | -9.47x10 <sup>-6</sup> 1.41x10 <sup>-5</sup> |
| Absolute Error X        | 0.4409                  | 0.369                 | 0.233   | -0.283 1.165                                 |
| Absolute Error Y        | -0.1918                 | 0.454                 | 0.672   | -1.081 0.697                                 |
| Variability X           | -0.3296                 | 0.338                 | 0.329   | -0.991 0.332                                 |
| Variability Y           | 0.7546                  | 0.320                 | 0.018   | 0.127 1.382                                  |
| Contraction Expansion X | 0.0401                  | 0.162                 | 0.805   | -0.278 0.358                                 |
| Contraction Expansion Y | -0.2448                 | 0.115                 | 0.034   | -0.471 -0.019                                |
| ShiftX                  | 0.1218                  | 0.147                 | 0.407   | -0.166 0.409                                 |
| ShiftY                  | 0.0902                  | 0.145                 | 0.534   | -0.194 0.374                                 |

**Supplemental Table S1. Predictive model coefficients** – Coefficients, standard error, p values and 95% confidence intervals presented for each measure within each predictive model. Absolute coefficients used to infer the relative importance of a given feature to each model. TLT = Thumb Localisation Test, BIT = Behavioural Inattention Test, FIM = Functional Independence Measure, VLSM = Voxel-based Lesion Symptom Mapping.
